# Supplementary material for: Self-templated induced carbon-supported hollow WS2 composite structure for high-performance sodium storage
Source: Royal Society of Chemistry journal article supplement (doi:10.1039/d1ta04858a), 2021-01-01
Supplement: d1ta04858a1.pdf [file d1ta04858a1.pdf]

**Supplementary Information for**  
Self-templated induced carbon supported hollow WS<sub>2</sub>  
composite structure for high performance sodium storage

*Xiaomin Luo<sup>a</sup>, Jianfeng Huang<sup>a,\*</sup>, Yixuan Huang<sup>b</sup>, Liyun Cao<sup>a,\*</sup>, Jiayin Li<sup>a,\*</sup>, Yuhang  
Wang<sup>a</sup>, Zhanwei Xu<sup>a</sup>, Shiyong Wei<sup>a</sup>, Koji Kajiyoshi<sup>c</sup>*

*a School of Material Science and Engineering, International S&T Cooperation  
Foundation of Shaanxi Province, Xi'an Key Laboratory of Green Manufacture of  
Ceramic Materials, Shaanxi University of Science and Technology, Xi'an 710021,  
China*

*b Department of Chemical Engineering, Monash University, Clayton, Victoria 3168,  
Australia*

*c Kochi University, Research Laboratory of Hydrothermal Chemistry, Kochi 780-  
8520, Japan*

□ E-mail: [huangjf@sust.edu.cn](mailto:huangjf@sust.edu.cn)

[caoliyun@sust.edu.cn](mailto:caoliyun@sust.edu.cn)

[lijiyin@sust.edu.cn](mailto:lijiyin@sust.edu.cn)

## Supporting Information

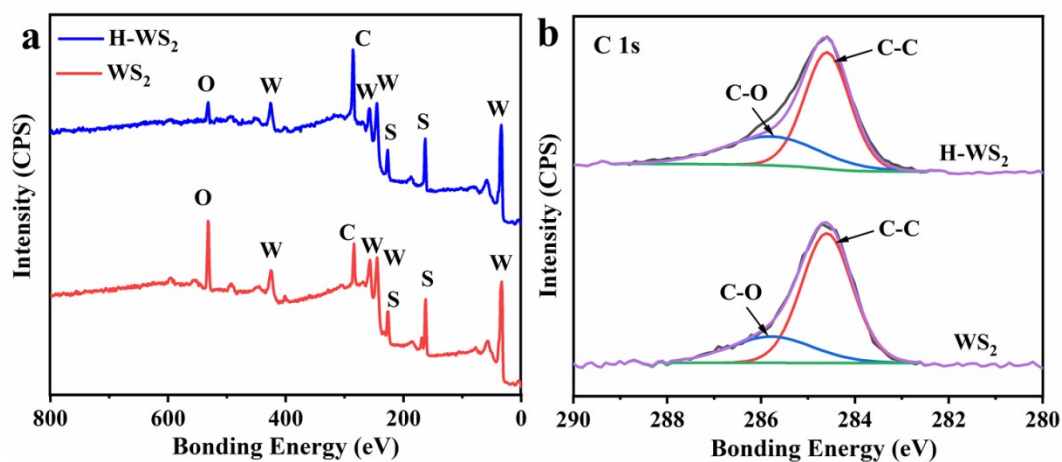

Fig. S1 XPS full survey spectra of H-WS<sub>2</sub> and WS<sub>2</sub> (a), high-resolution XPS spectra of H-WS<sub>2</sub> and WS<sub>2</sub> for C 1s.

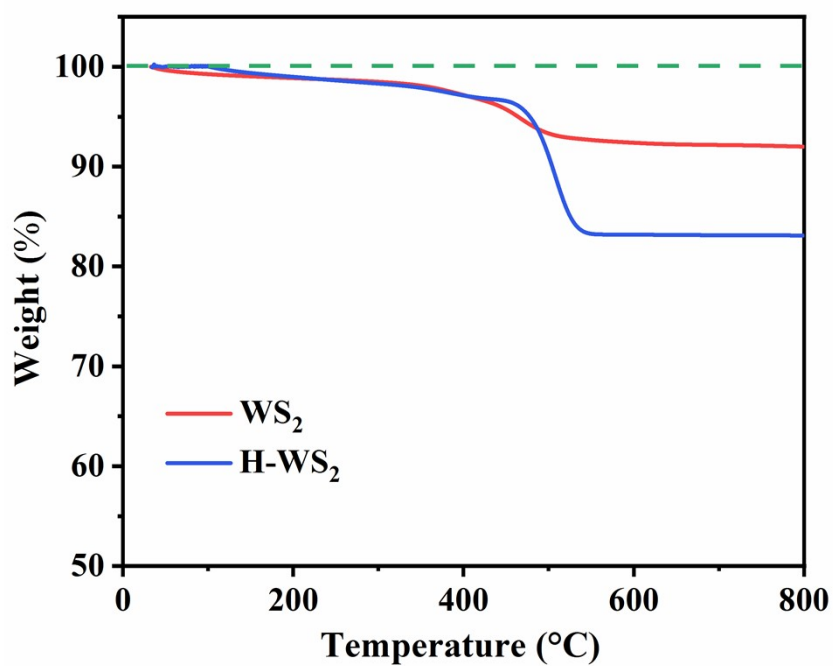

Fig. S2. TGA curves of WS<sub>2</sub>, and H-WS<sub>2</sub>.

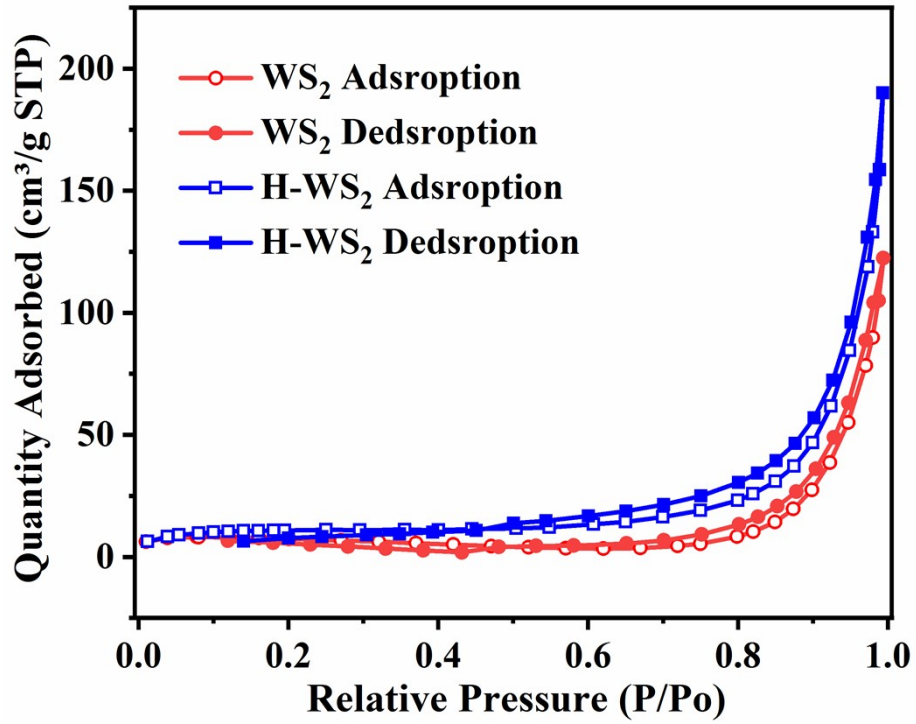

Fig. S3. N<sub>2</sub> adsorption–desorption isotherms of the WS<sub>2</sub>, and H-WS<sub>2</sub>.

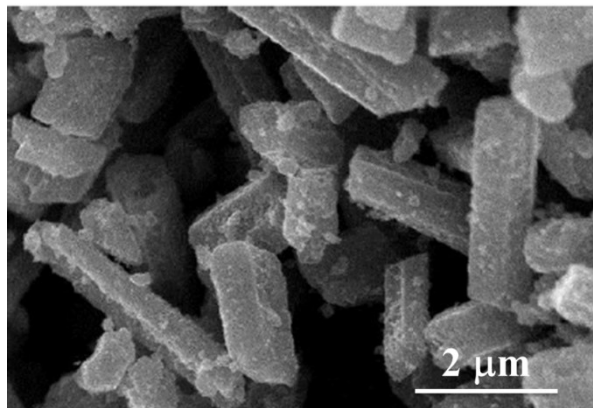

Fig. S4 The morphology of glucose.

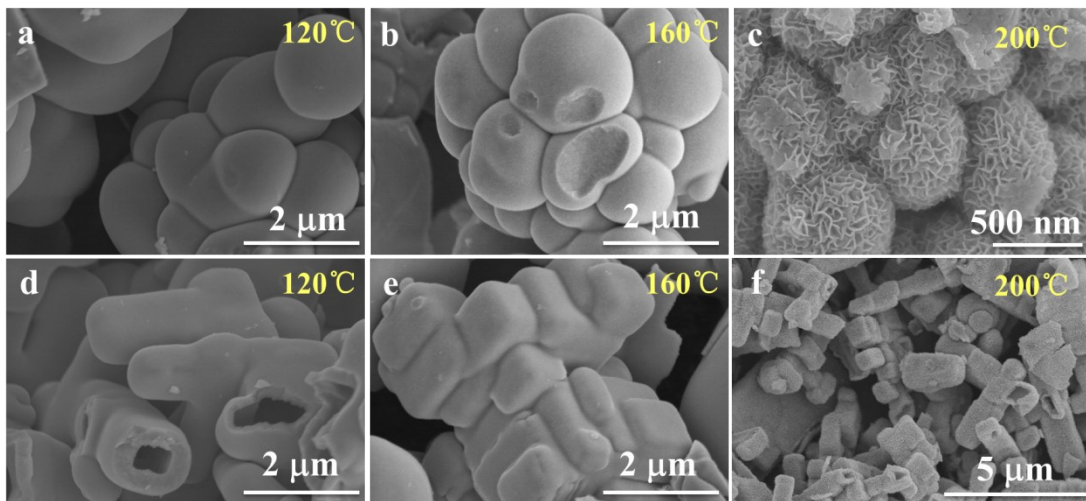

Fig. S5 The SEM images of WS<sub>2</sub> at 120 °C(a); 160 °C (b); 200 °C (c) for 24h, the SEM images of H-WS<sub>2</sub> at 120 °C (d); 160 °C (e); 200 °C (f) for 24 h.

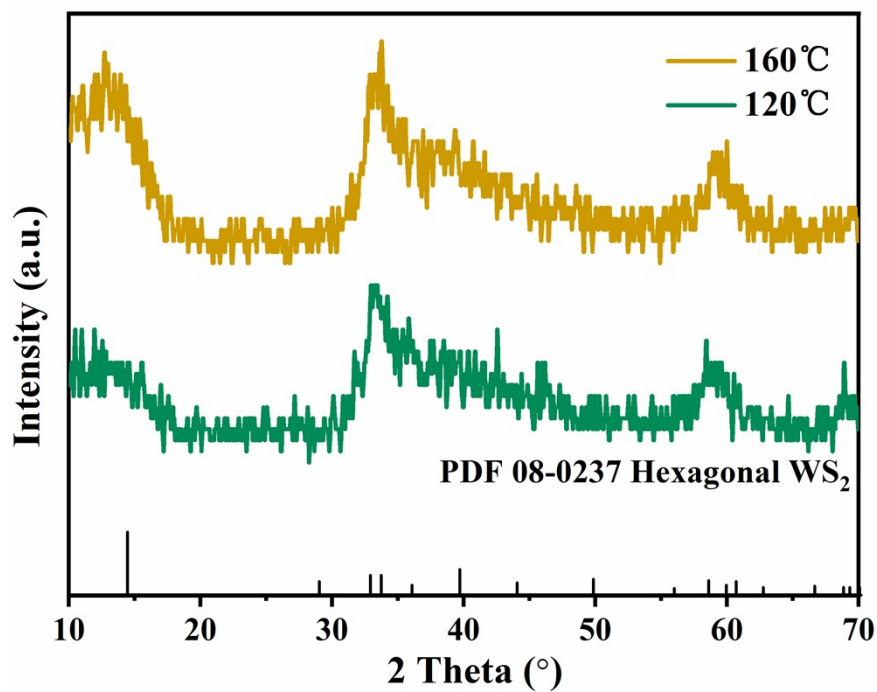

Fig. S6 The XRD patterns of WS<sub>2</sub> at 120 °C and 160 °C for 24h.

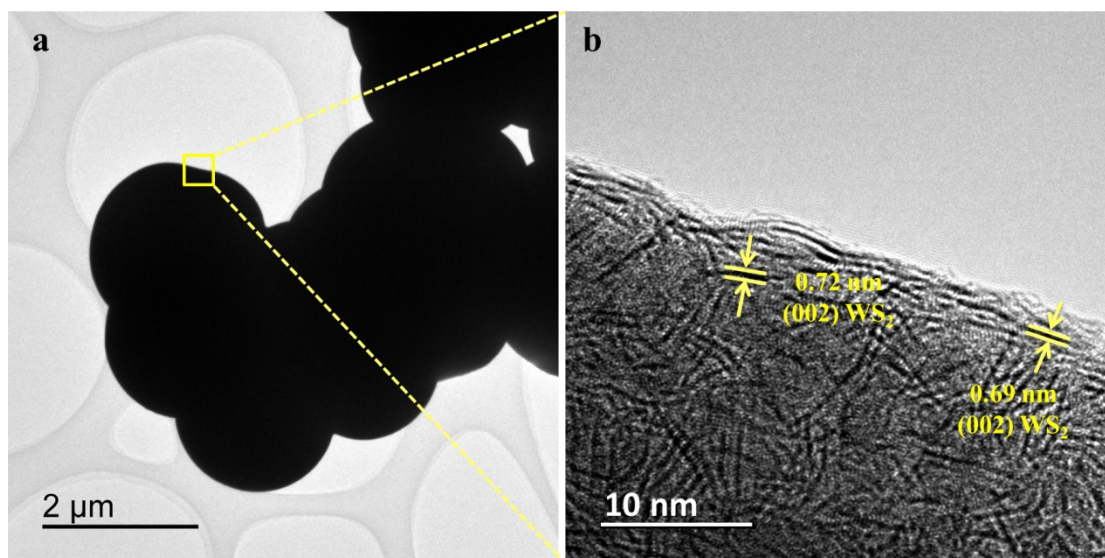

Fig. S7 The TEM image (a) and HRTEM image (b) of WS<sub>2</sub> at 120 °C for 24h.

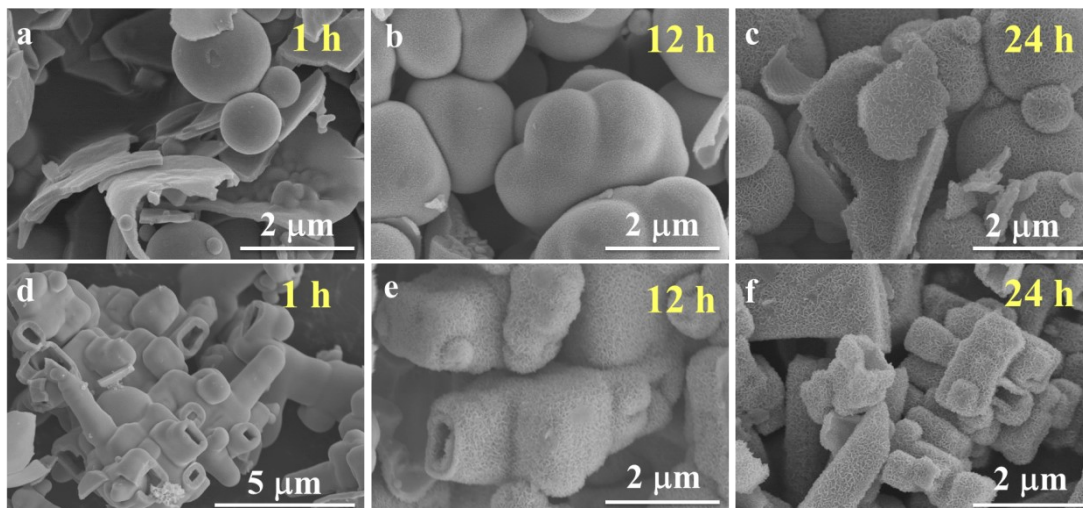

Fig. S8 The SEM images of WS<sub>2</sub> at 200 °C for 1 h (a); 12 h (b) and 24 h (c), the SEM images of H-WS<sub>2</sub> at 200 °C for 1 h (d); 12 h (e) and 24 h (f).

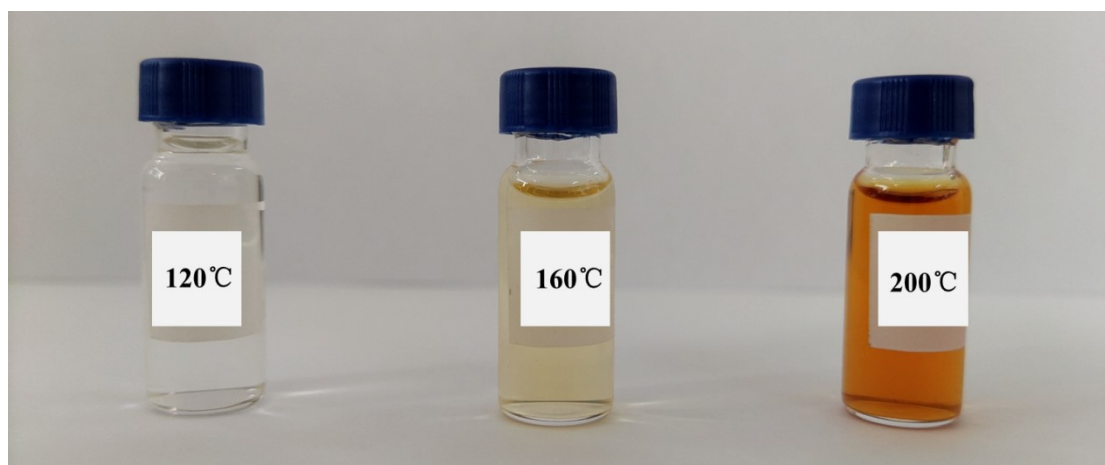

Fig. S9 The pictures of glucose solvothermal in ethanol at 120 °C (a); 160 °C (b); 200 °C (c) for 24 h.

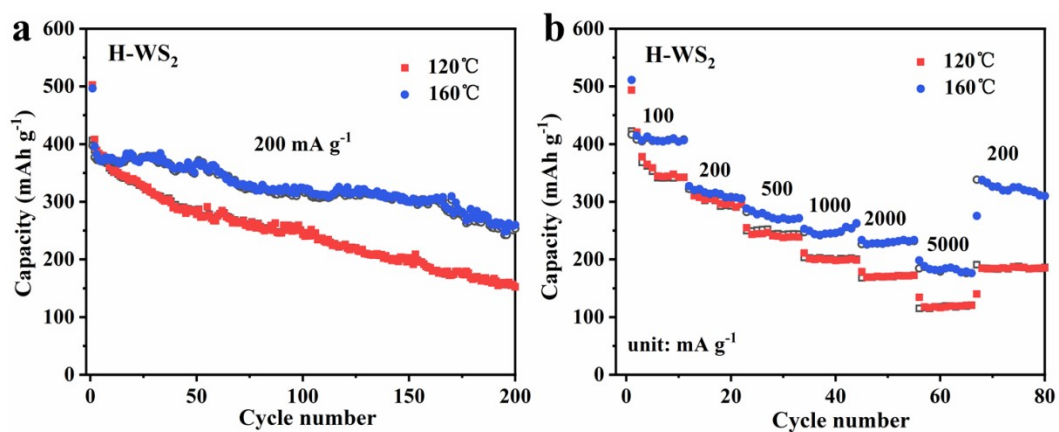

Fig. S10. Electrochemical performance of H-WS<sub>2</sub> electrodes at 120 °C and 160 °C; (a) cycle performance; (b) rate capability.



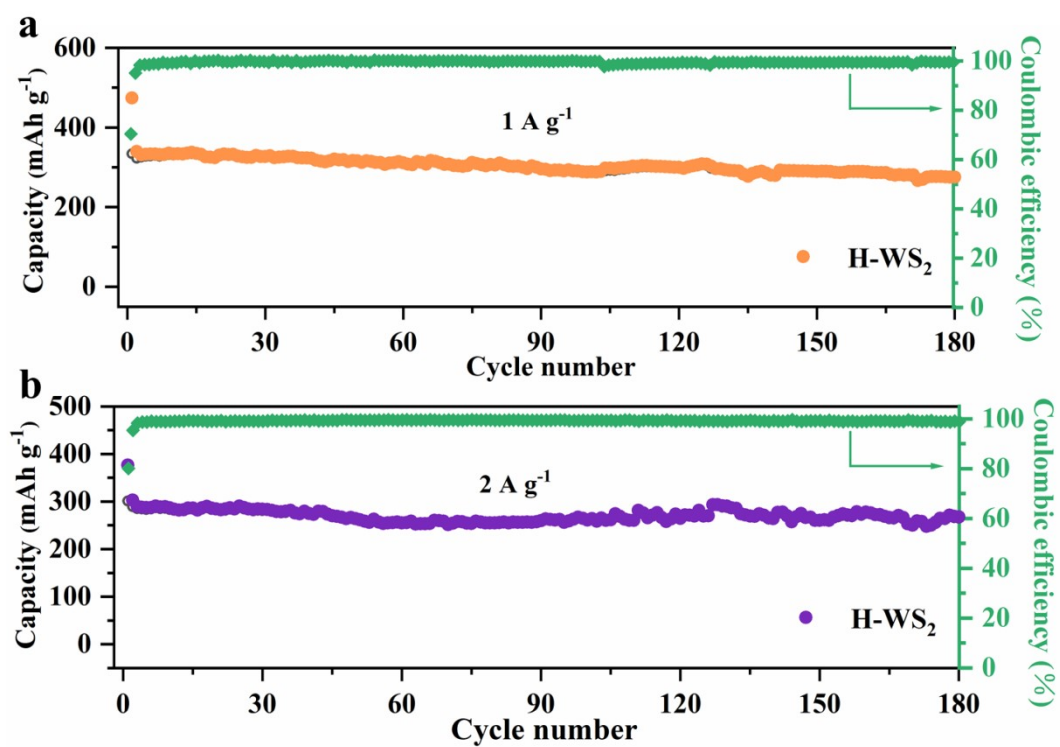

Fig. S11. Cycle performance of H-WS<sub>2</sub> electrodes at a current density of 1 A g<sup>-1</sup> (a) and 2 A g<sup>-1</sup> (b).

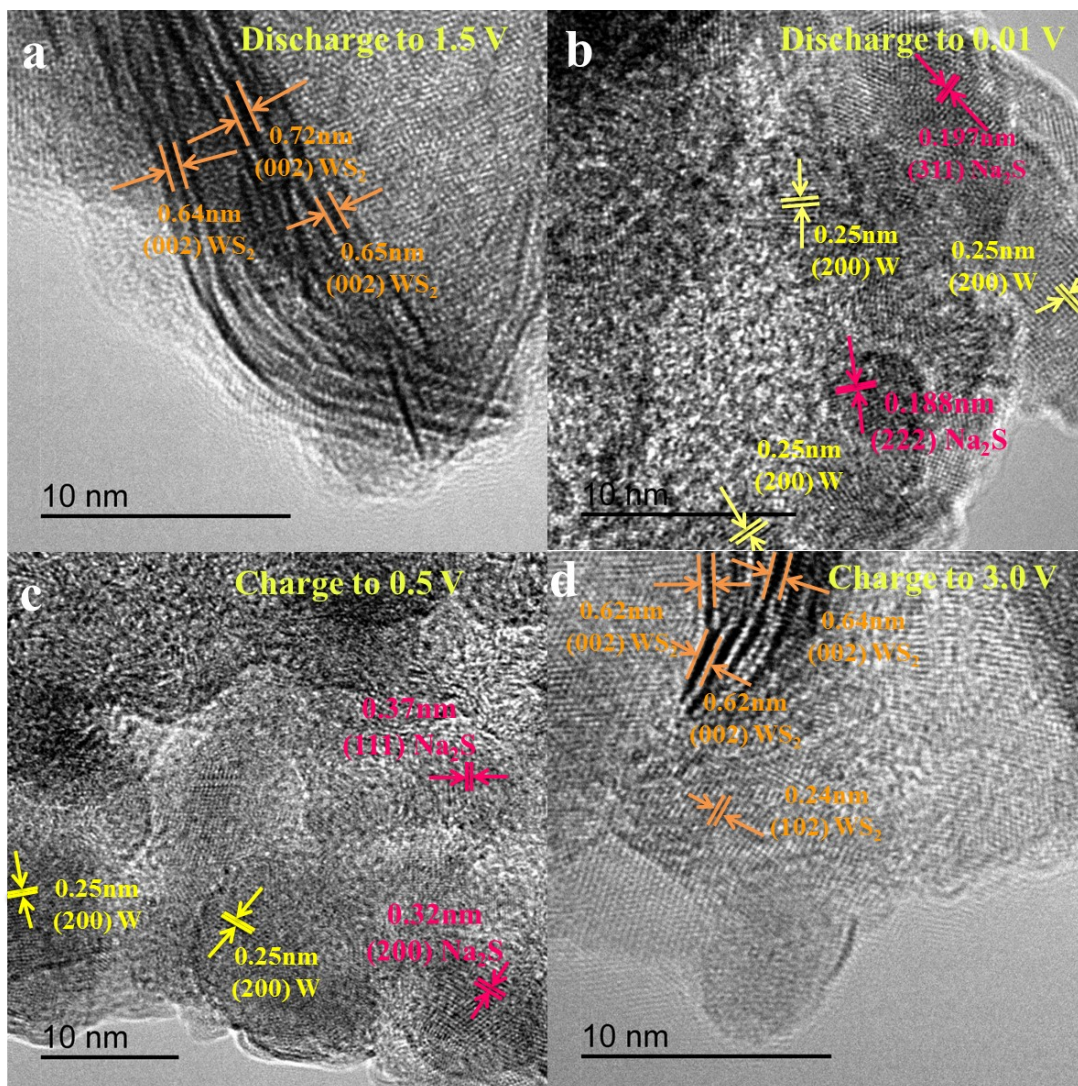

Fig. S12. *Ex-situ* transmission electron microscope images at different reaction stages in the first cycle of H-WS<sub>2</sub> electrode discharge to 1.5 V (a) and 0.01 V (b); charge to 0.5 V (c) and 3 V (d).

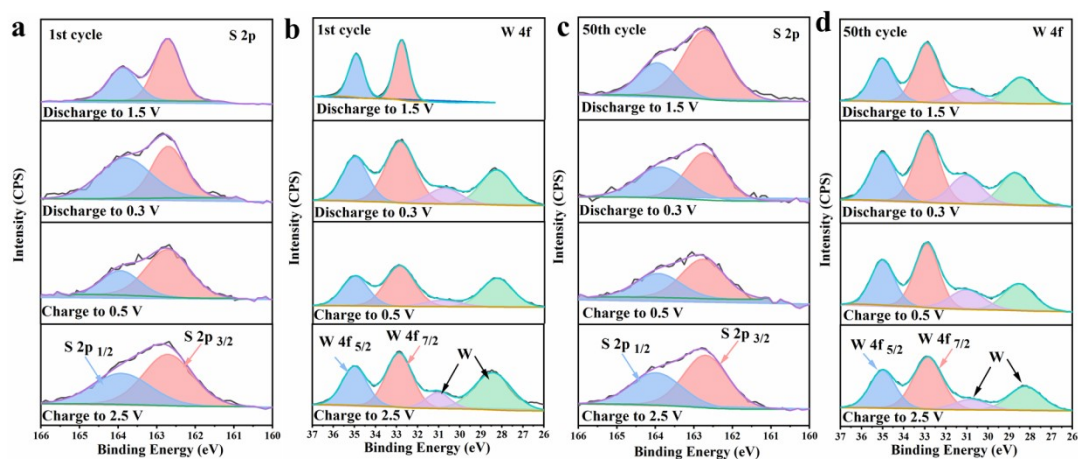

Fig. S13. *Ex situ* XPS analysis of H-WS<sub>2</sub> electrodes tested at various charge-discharge states for the 1st and 50th cycles.

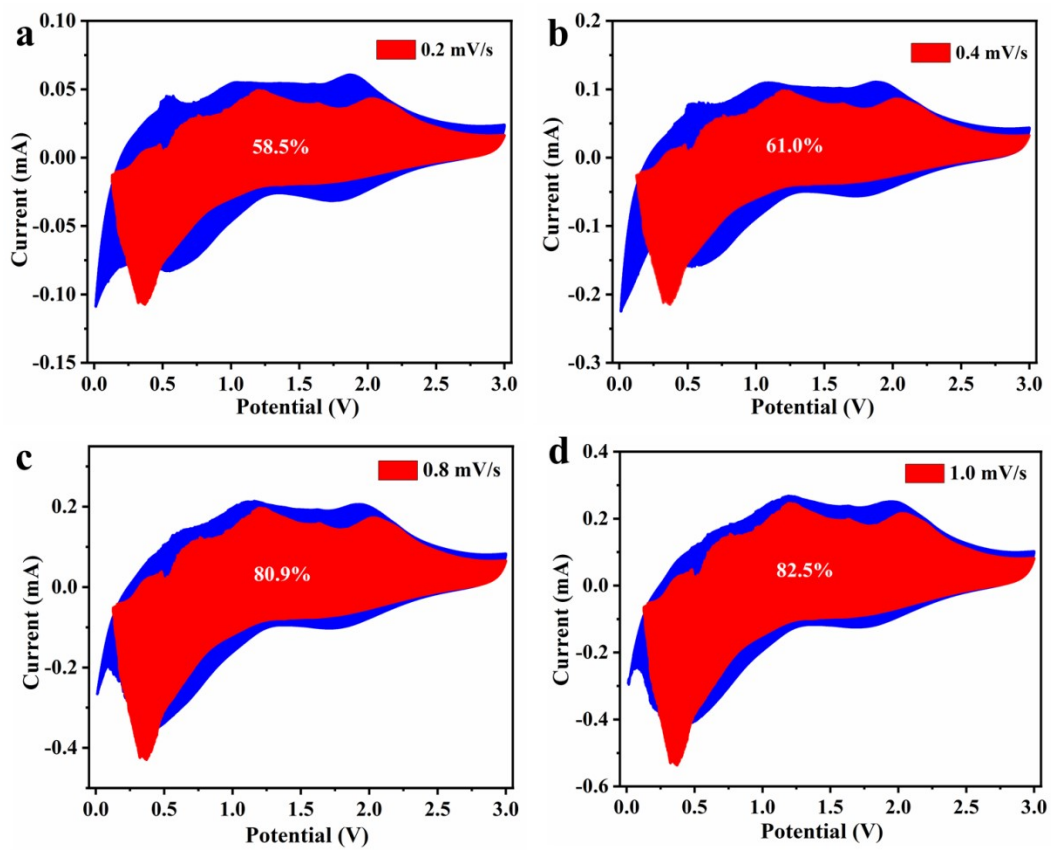

Fig. S14. Capacitive (red) and diffusion-controlled contribution to charge storage of H-WS<sub>2</sub> at (a) 0.2 mV s<sup>-1</sup>; (b) 0.4 mV s<sup>-1</sup>; (c) 0.8 mV s<sup>-1</sup>; (d) 1.0 mV s<sup>-1</sup>.



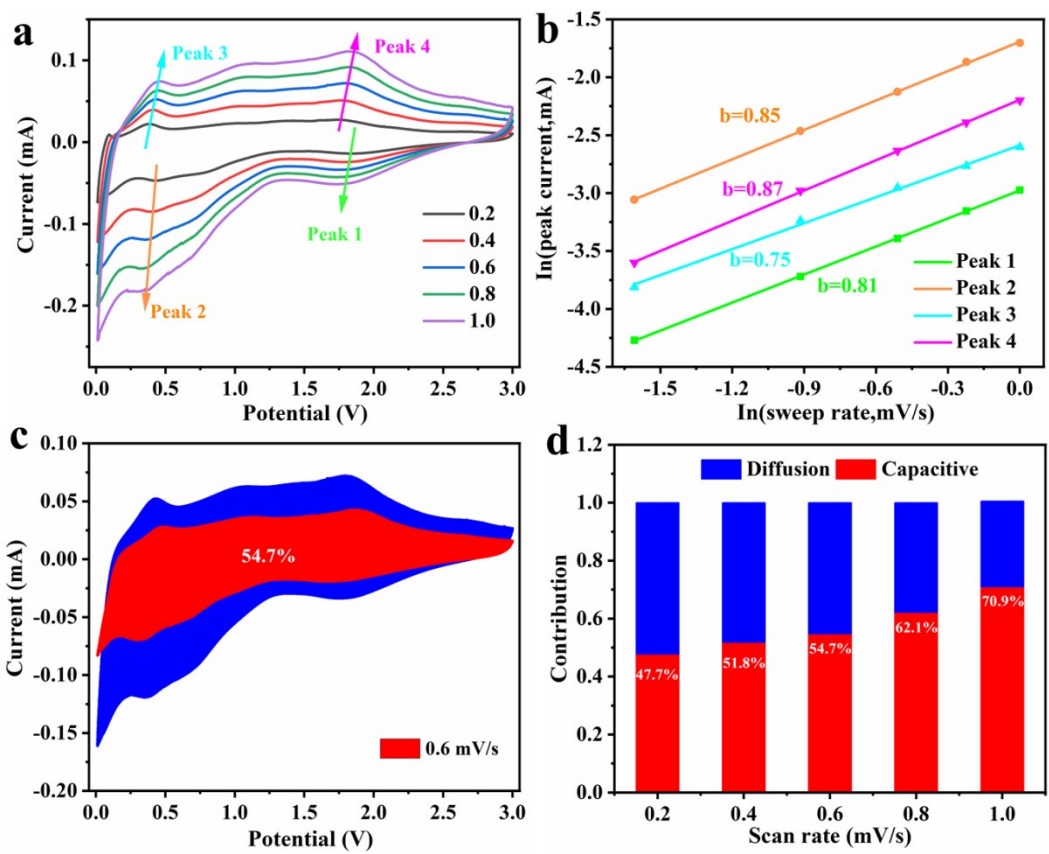

Fig. S15. Cyclic voltammograms of the electrodes at different scan rates for WS<sub>2</sub> (a); ln*i* vs ln*v* plots of WS<sub>2</sub> (b); Capacitive (red) and diffusion-controlled contribution to charge storage of WS<sub>2</sub> (c) at 0.6 mV s<sup>-1</sup>; normalized contribution ratios of capacitive (red) and diffusion-controlled capacities at different scan rates of WS<sub>2</sub> (d).

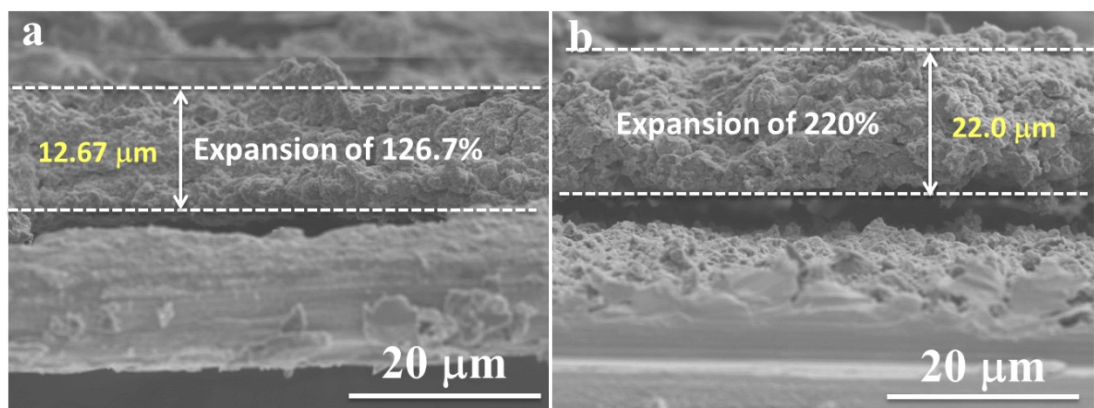

Fig. S16. The thickness of the H-WS<sub>2</sub> (a) and WS<sub>2</sub> (b) electrodes after 100 cycles.

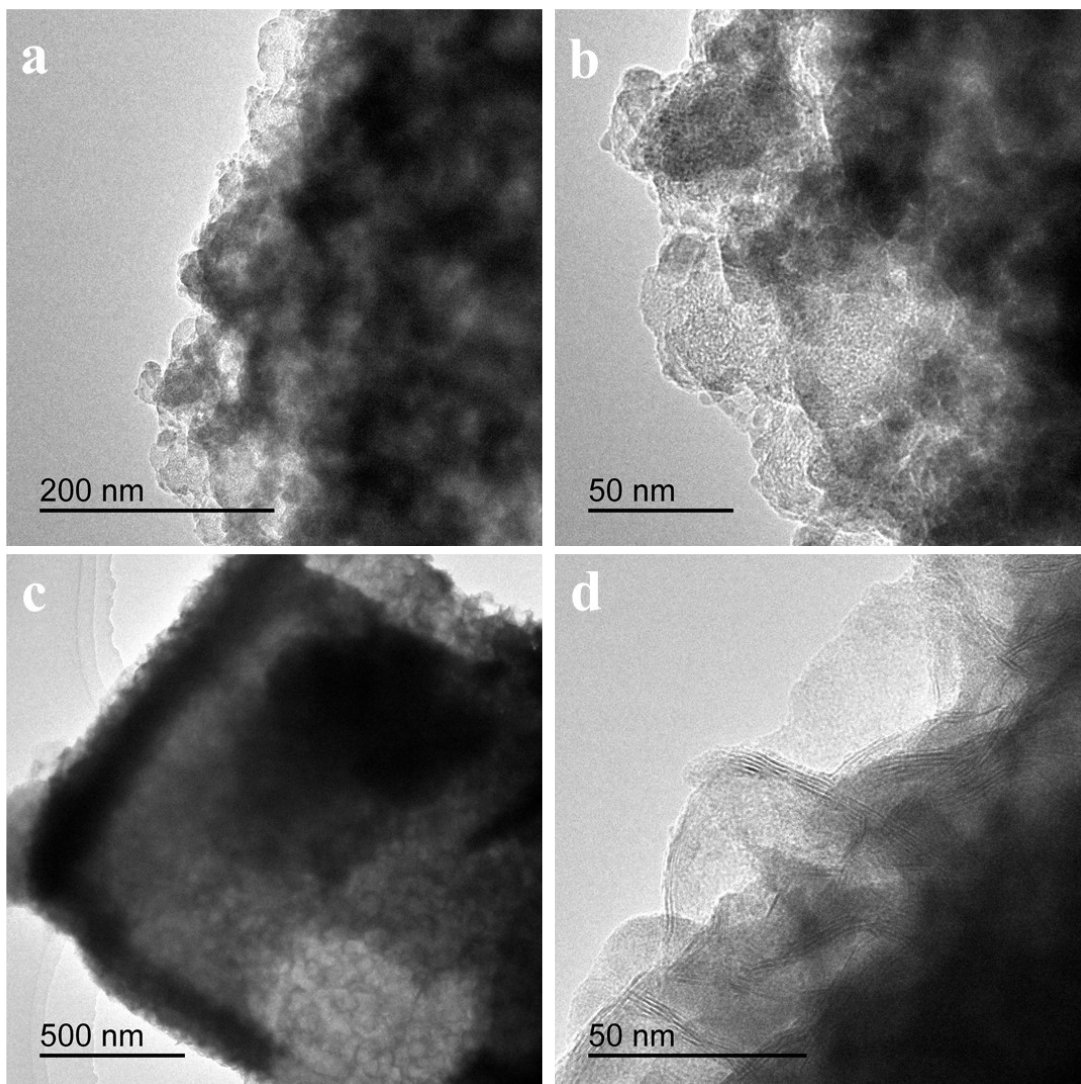

Fig. S17. Ex situ TEM images of WS<sub>2</sub> (a, b) and H-WS<sub>2</sub> (c, d) after 50 cycles.

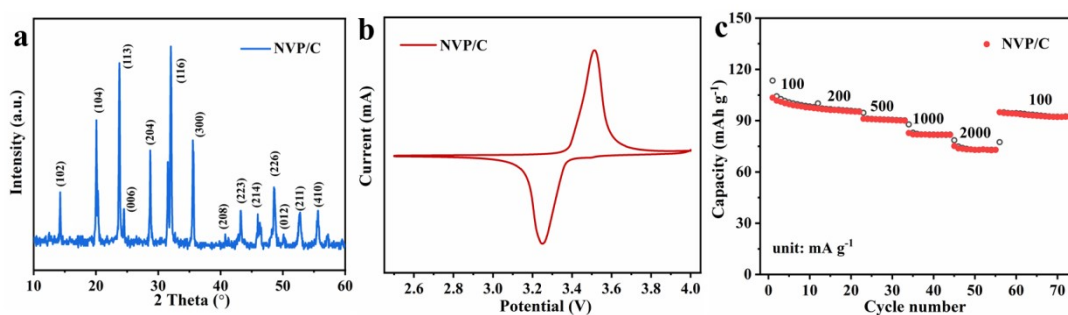

Fig. S18. (a) XRD patterns of Na<sub>3</sub>V<sub>2</sub>(PO<sub>4</sub>)<sub>3</sub>/C; (b) CV curve of Na<sub>3</sub>V<sub>2</sub>(PO<sub>4</sub>)<sub>3</sub>/C half cells at a scanning rate of 0.1 mV·s<sup>-1</sup>, the rate capacity of Na<sub>3</sub>V<sub>2</sub>(PO<sub>4</sub>)<sub>3</sub>/C half cells.
